# Supplementary material
Source: publisher figshare collection journal article supplement (https://acs.figshare.com/ndownloader/files/11399531)
Supplement: Supplementary file 1 [file 11399531]

## Supporting Information:

### *N*-Phenylglycine as a Versatile Photoinitiator under Near UV LED

J. Zhang,<sup>†,‡,⊥,§</sup> J. Lalevée,<sup>‡,⊥</sup> X. Mou,<sup>§</sup> F. Morlet-Savary,<sup>‡,⊥</sup> B. Graff,<sup>‡,⊥</sup> and P. Xiao<sup>\*,†,‡,⊥,§</sup>

<sup>†</sup> Research School of Chemistry, Australian National University, Canberra, ACT 2601, Australia

<sup>‡</sup> Université de Haute-Alsace, CNRS, IS2M UMR 7361, Cedex F-68100 Mulhouse, France

<sup>⊥</sup> Université de Strasbourg, France

<sup>§</sup> School of Chemistry, University of New South Wales, Sydney, NSW 2052, Australia

Corresponding Authors: pu.xiao@anu.edu.au

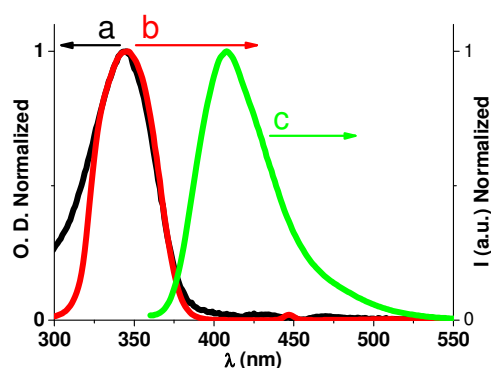

**Figure S1.** UV-vis absorption spectrum (curve a), fluorescence excitation spectrum (curve b), and fluorescence emission spectrum (curve c) of NPG in acetonitrile.

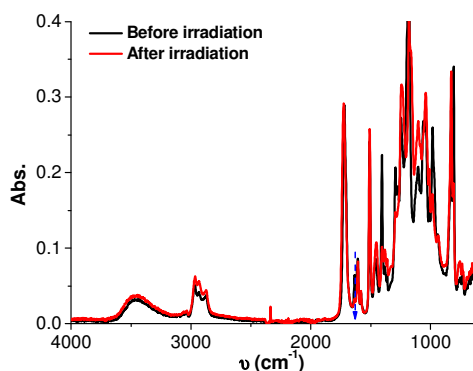

**Figure S2.** IR spectra recorded before and after the photopolymerization of EB605 in laminate in the presence of NPG/Iod (2%/2%, wt) upon exposure to the UV LED@392 nm (100 mW cm<sup>-2</sup>). The IR band of double bonds of EB605 is observed at ~1635 cm<sup>-1</sup>.

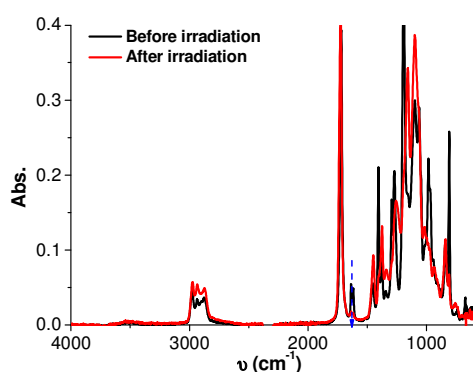

**Figure S3.** IR spectra recorded before and after the photopolymerization of TPGDA in laminate in the presence of NPG/Iod (0.5%/2%, wt) upon exposure to the UV LED@392 nm ( $100 \text{ mW cm}^{-2}$ ). The IR band of double bonds of TPGDA is observed at  $\sim 1635 \text{ cm}^{-1}$ .

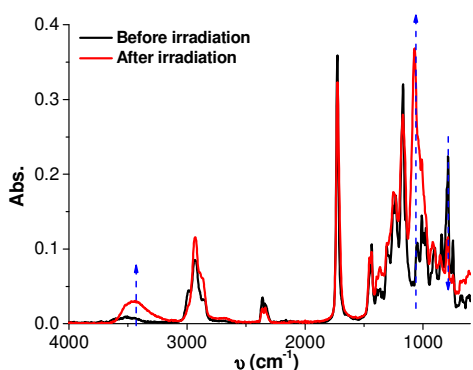

**Figure S4.** IR spectra recorded before and after the photopolymerization of EPOX under air in the presence of NPG/Iod (0.5%/2%, wt) upon exposure to the UV LED bulb@392 nm ( $100 \text{ mW cm}^{-2}$ ). The IR bands of the epoxy, polyether, and hydroxyl group are observed at  $\sim 790 \text{ cm}^{-1}$ ,  $\sim 1070 \text{ cm}^{-1}$ , and  $\sim 3430 \text{ cm}^{-1}$  respectively.

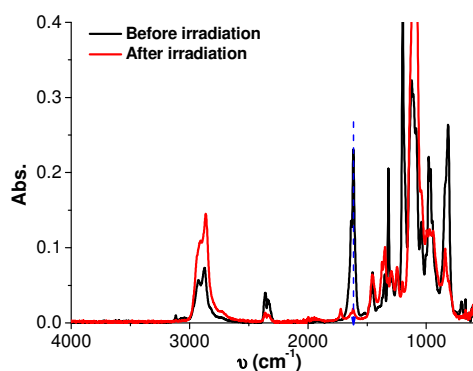

**Figure S5.** IR spectra recorded before and after the photopolymerization of DVE-3 in laminate in the presence of NPG/Iod (0.5%/2%, wt) upon exposure to the UV LED@392 nm ( $100 \text{ mW cm}^{-2}$ ). The IR band of double bonds of DVE-3 is observed at  $\sim 1620 \text{ cm}^{-1}$ .
